# Supplementary material
Source: HighWire-hosted journal article supplement (https://jitc.bmj.com/content/7/1/225)
Supplement: media-1 [file media-1.zip]

CD4 Ki67

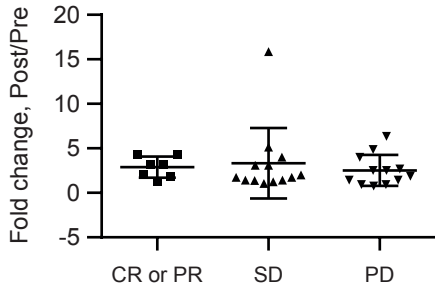

Best Overall Response

CD8 Ki67

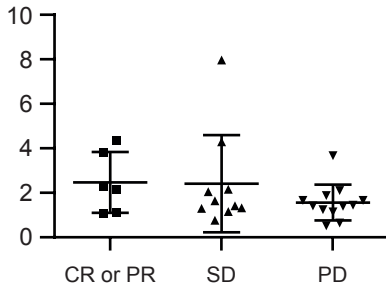

Best Overall Response

CD4 T<sub>EM</sub>  
CD38<sup>high</sup>/HLA-DR<sup>high</sup>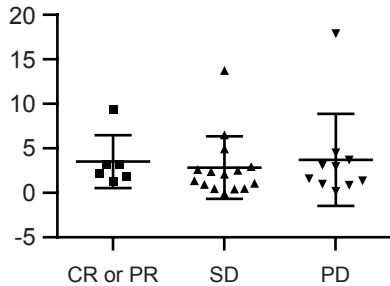

Best Overall Response
