# Supplementary material
Source: HighWire-hosted journal article supplement (https://jitc.bmj.com/content/7/1/225)
Supplement: media-1 [file media-1.zip]

**Screening period**

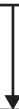

**Study treatment for 12 months or until  
progressive disease**

Cohort 1: 0.1 mg/kg Q3W

Cohort 2: 0.5 mg/kg Q3W

Cohort 3: 2.5 mg/kg Q3W

Cohort 4: 10 mg/kg Q3W

Cohort 5: 20 mg/kg Q3W

Cohort 6: 10 mg/kg Q2W

Cohort 7: 20 mg/kg Q2W

Cohort 8: 20 mg/kg QWx2, then Q2W

Cohort 9: 10 mg/kg QWx4, then Q2W

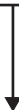

**Survival follow-up**

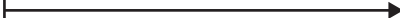

**Retreatment offered per  
criteria and rules**

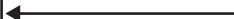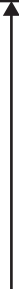

**Progressive disease after  
12-month treatment period**
