# Supplementary material
Source: HighWire-hosted journal article supplement (https://jitc.bmj.com/content/7/1/225)

# MEDI0680 Binding to Activated Primary Human T cells

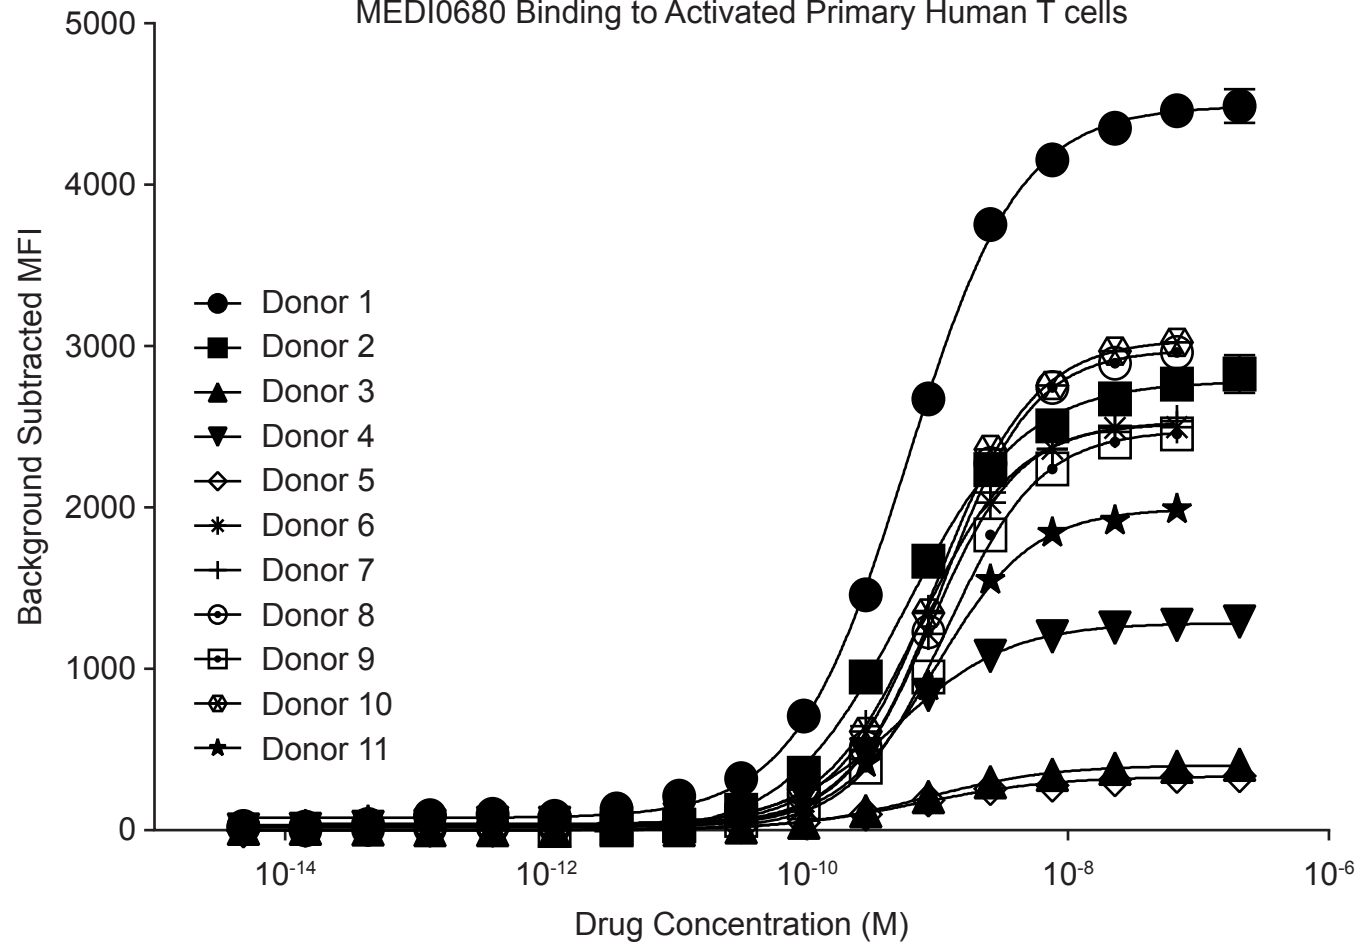

Supplement: media-1 [file media-1.zip]

PD-L2

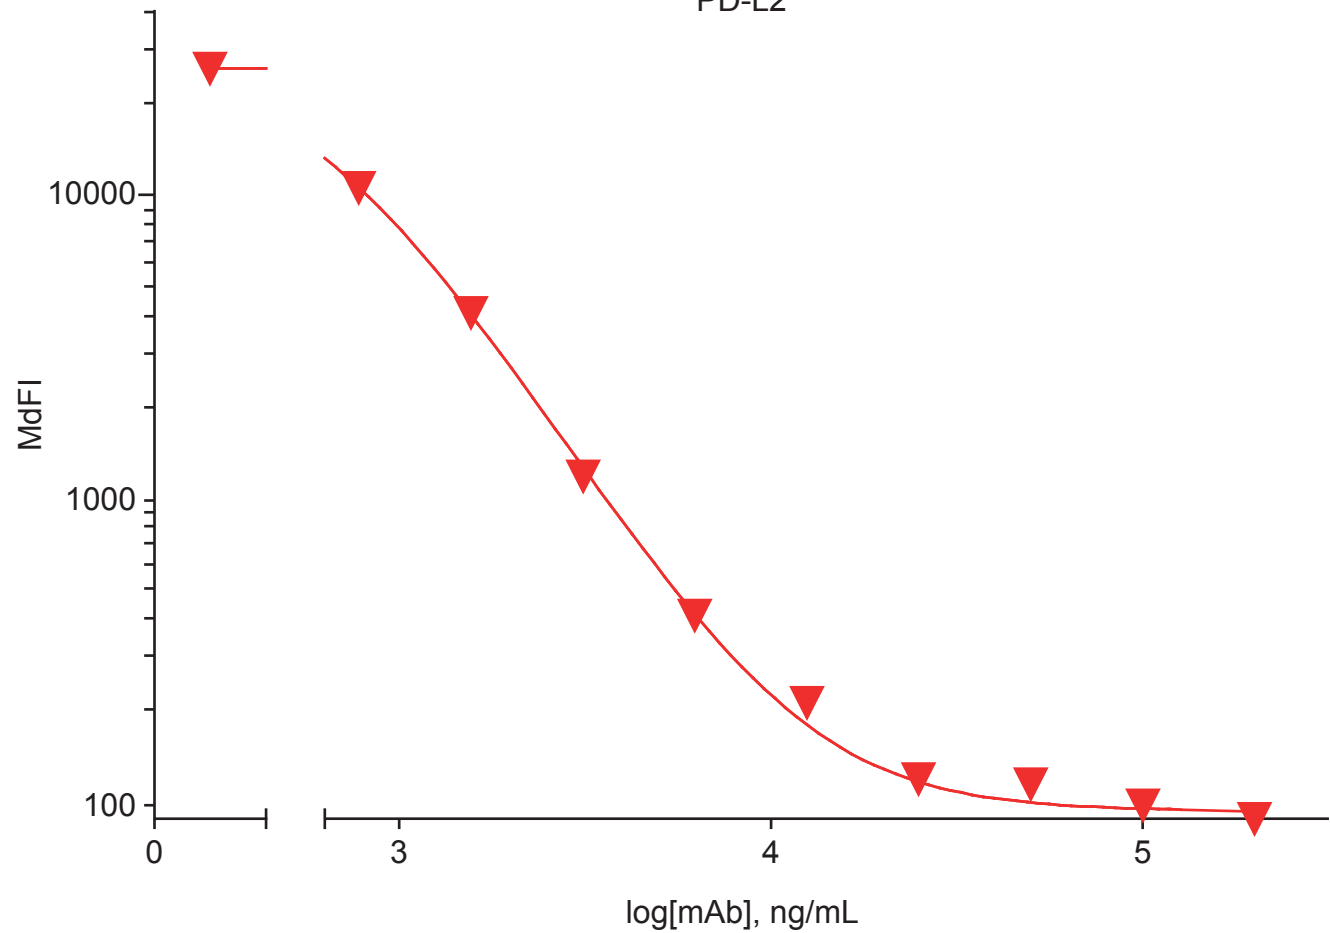

Supplement: media-1 [file media-1.zip]

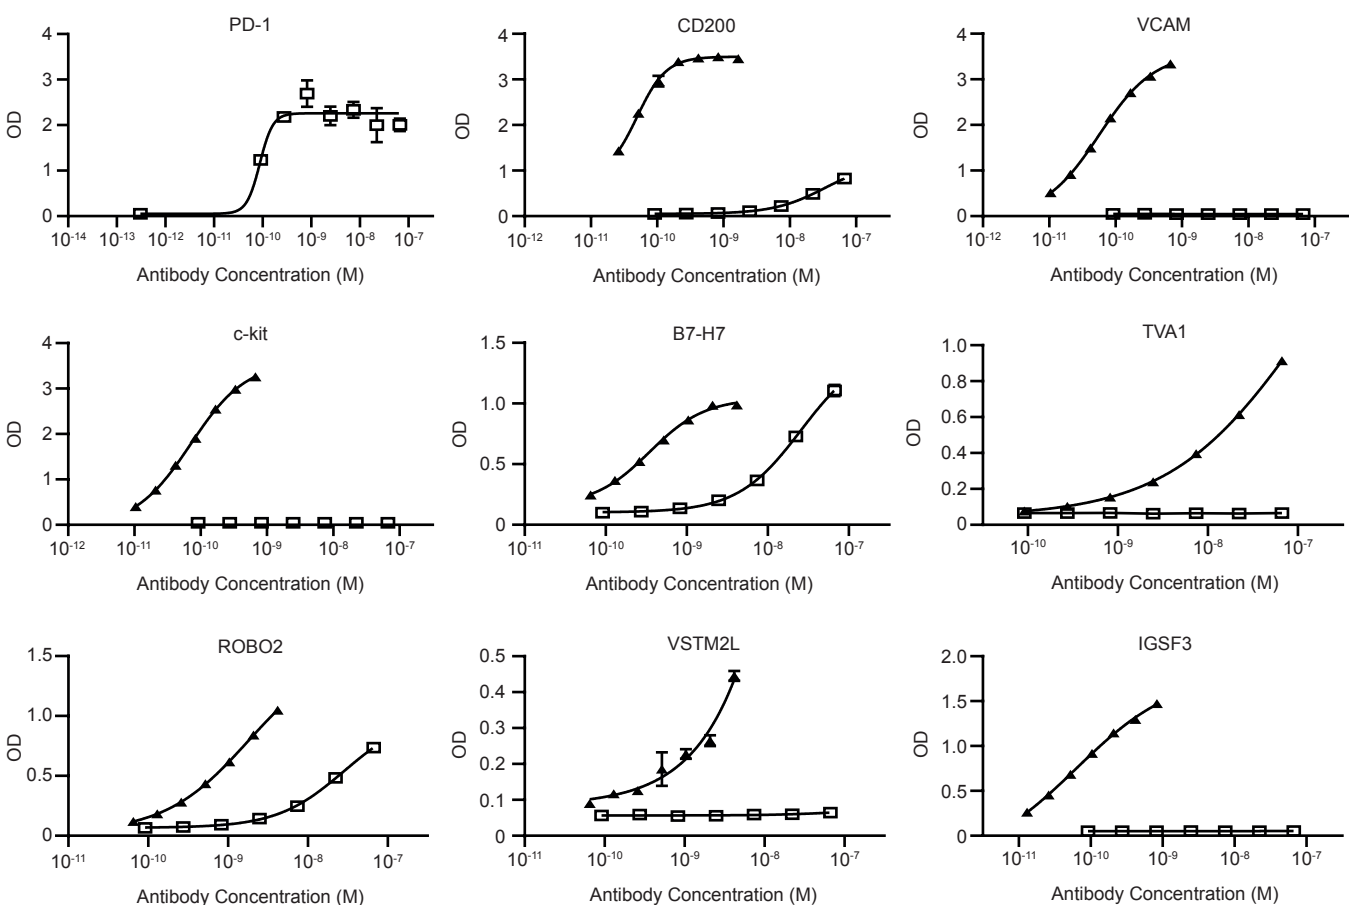

▲ Biotinylated target-specific mAb    ■ Biotinylated MEDI0680

Supplement: media-1 [file media-1.zip]

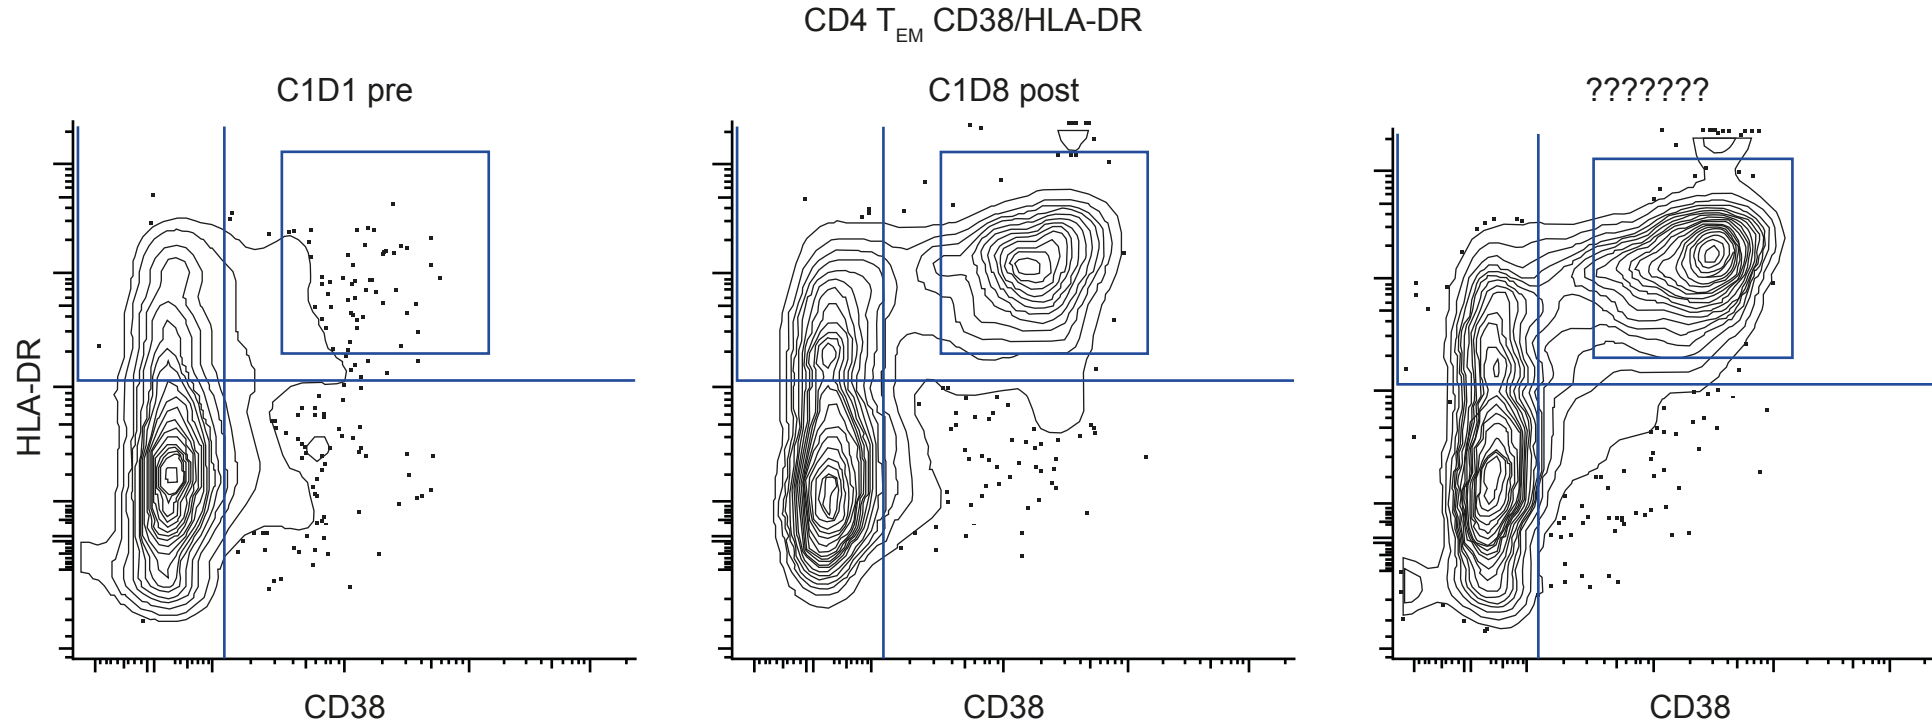

Supplement: media-1 [file media-1.zip]

Ki67

C1D1 pre

C1D8

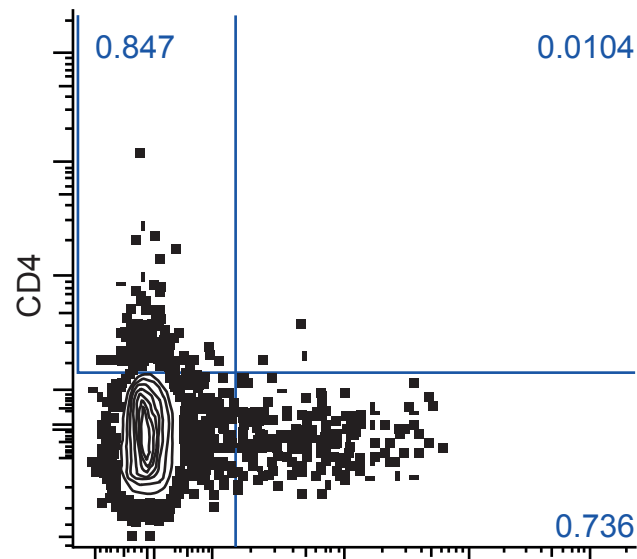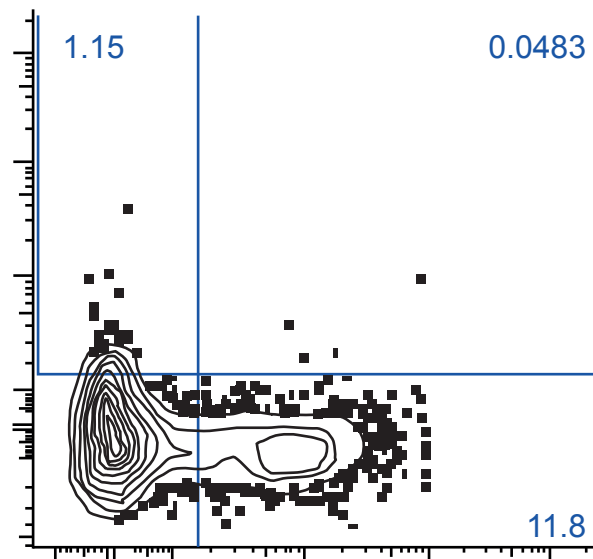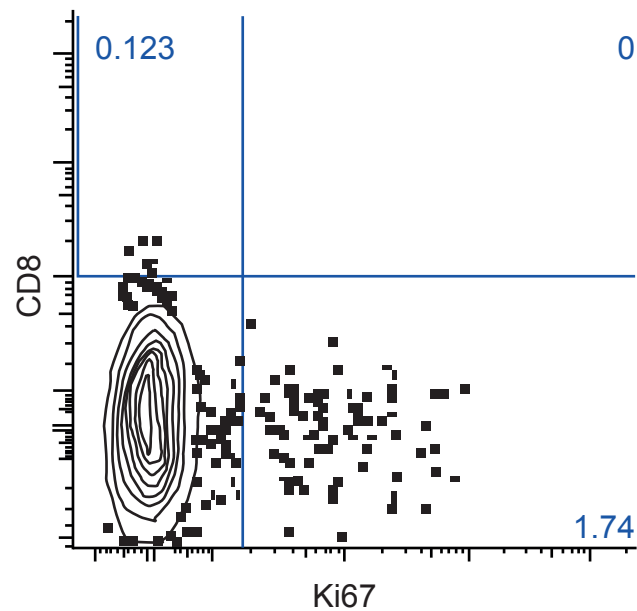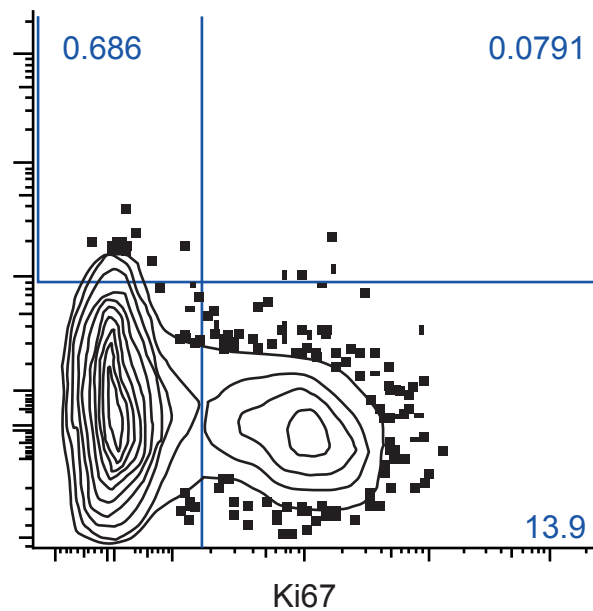

Supplement: media-1 [file media-1.zip]

E:T of 0.5:1

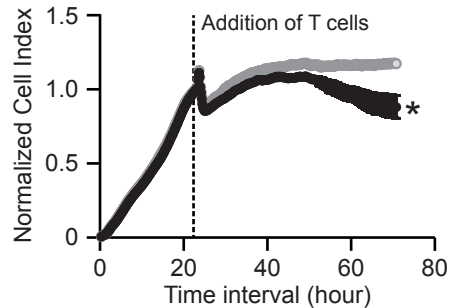

E:T of 1:1

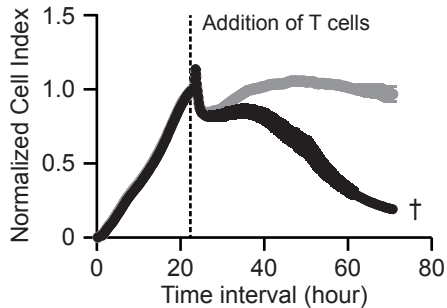

E:T of 2:1

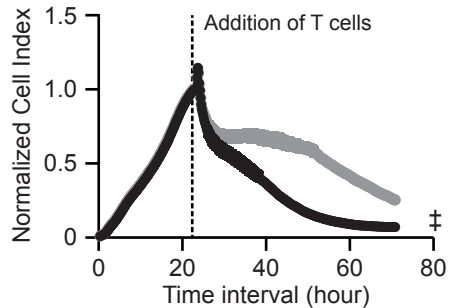—○— 10  $\mu$ g/mL Human IgG4P isotype control Ab—●— 10  $\mu$ g/mL MEDI0680

Supplement: media-1 [file media-1.zip]

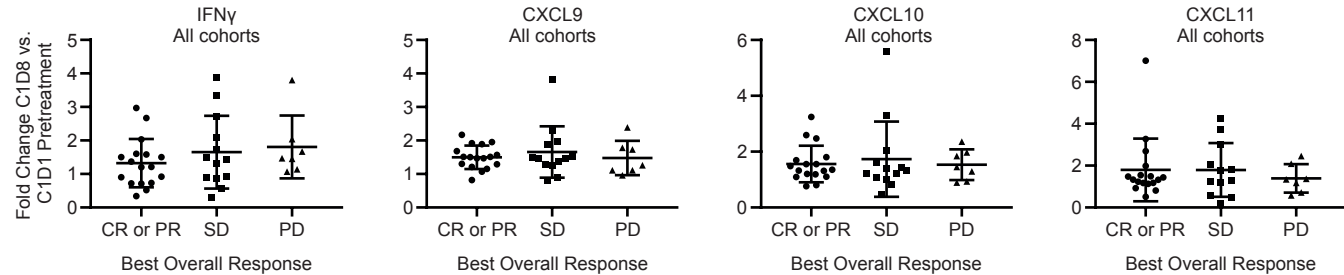

Supplement: media-1 [file media-1.zip]

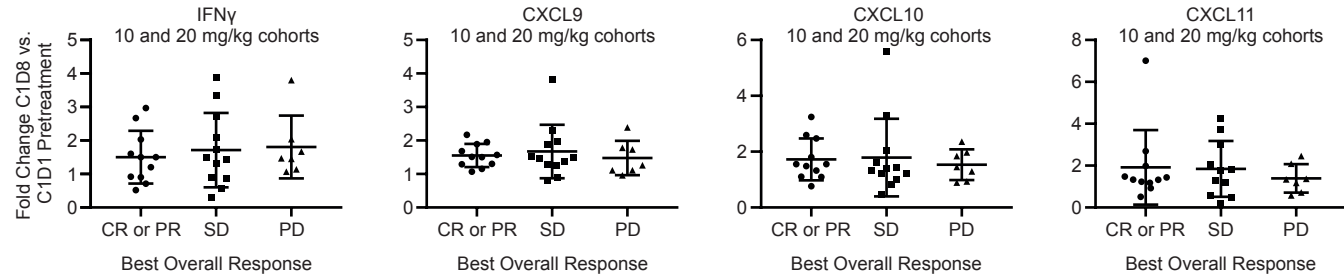

Supplement: media-1 [file media-1.zip]

IFN $\gamma$  release Donor A+B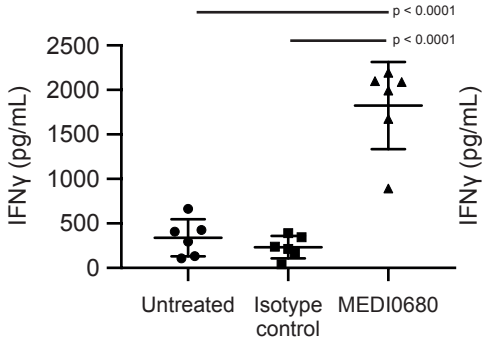IFN $\gamma$  release Donor A+C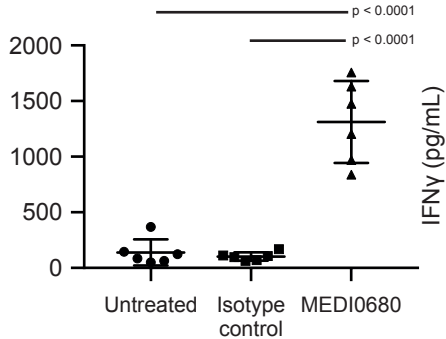IFN $\gamma$  release Donor D+E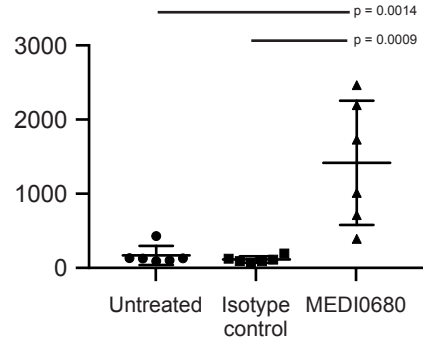

Supplement: media-1 [file media-1.zip]

PD-L1

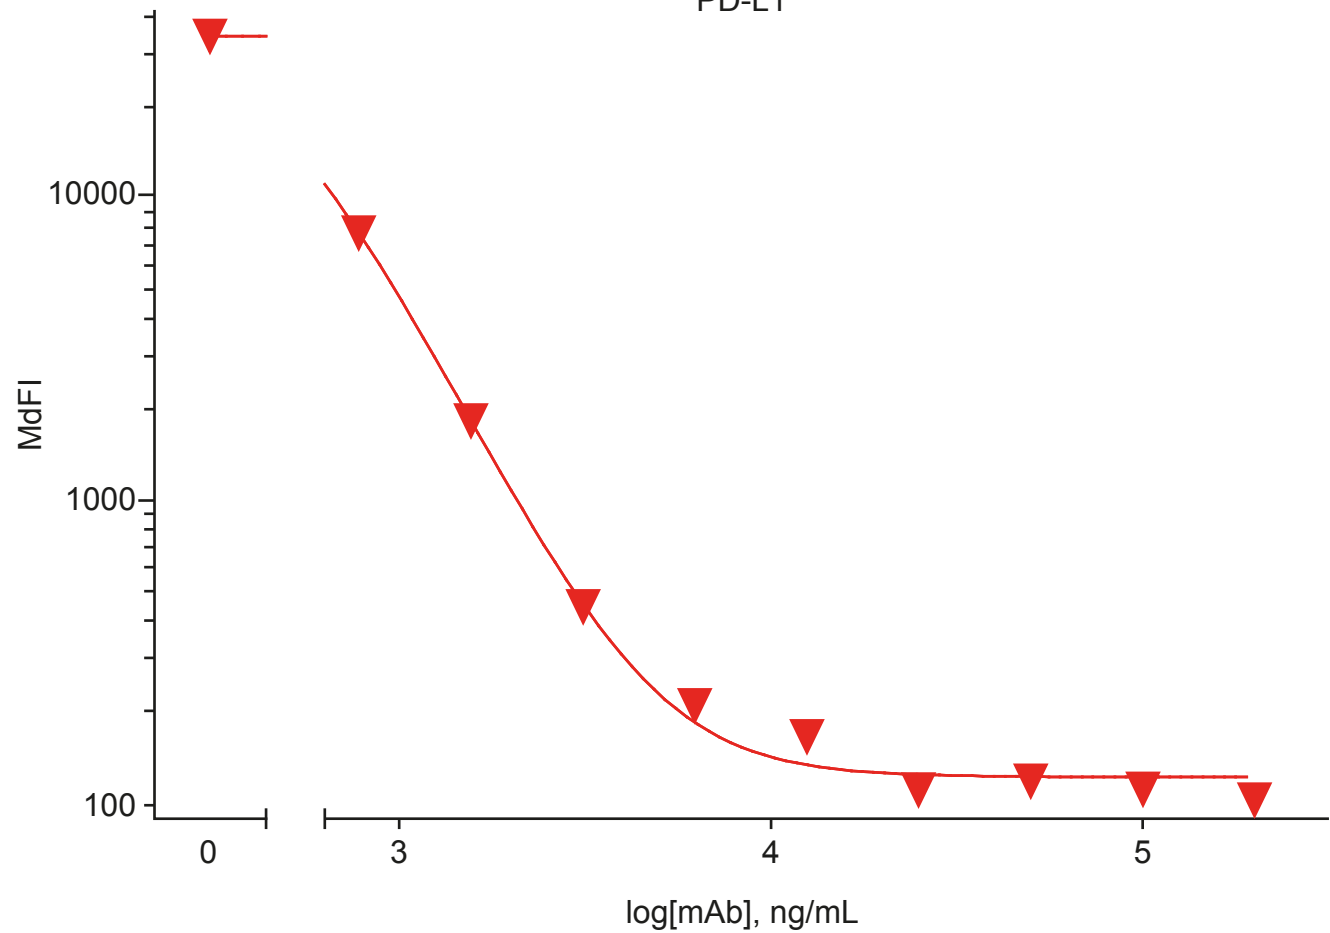

Supplement: media-1 [file media-1.zip]
